# Supplementary material
Source: PubMed Central journal article supplement (PMC9047756)

## Supplementary Online Content

Ho VP, Bensken WP, Warner DF, et al. Association of complex multimorbidity and long-term survival after emergency general surgery in older patients with Medicare. *JAMA Surg*. Published online April 27, 2022. doi:10.1001/jamasurg.2022.0811

### **eFigure.** Flow Diagram

This supplementary material has been provided by the authors to give readers additional information about their work.

**eFigure. Flow Diagram**

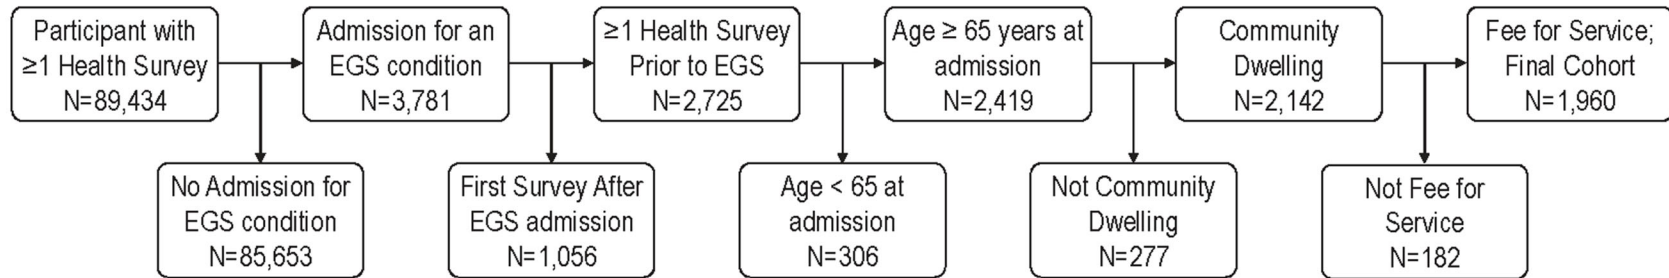

Supplement: jamasurg-e220811-s001.pdf [file jamasurg-e220811-s001.pdf]
